# Supplementary material for: Performance of the Adriatic early warning system during the multi-meteotsunami event of 11–19 May 2020: an assessment using energy banners
Source: Copernicus journal article supplement (doi:10.5194/nhess-2020-409), 2021-01-05
Supplement: Supplementary file 1 [file nhess-2020-409-supplement.pdf]

Event mode of the  
Adriatic meteotsunami  
early warning system  
triggered for the 11 May  
2020 & the 14-19 May  
2020 period

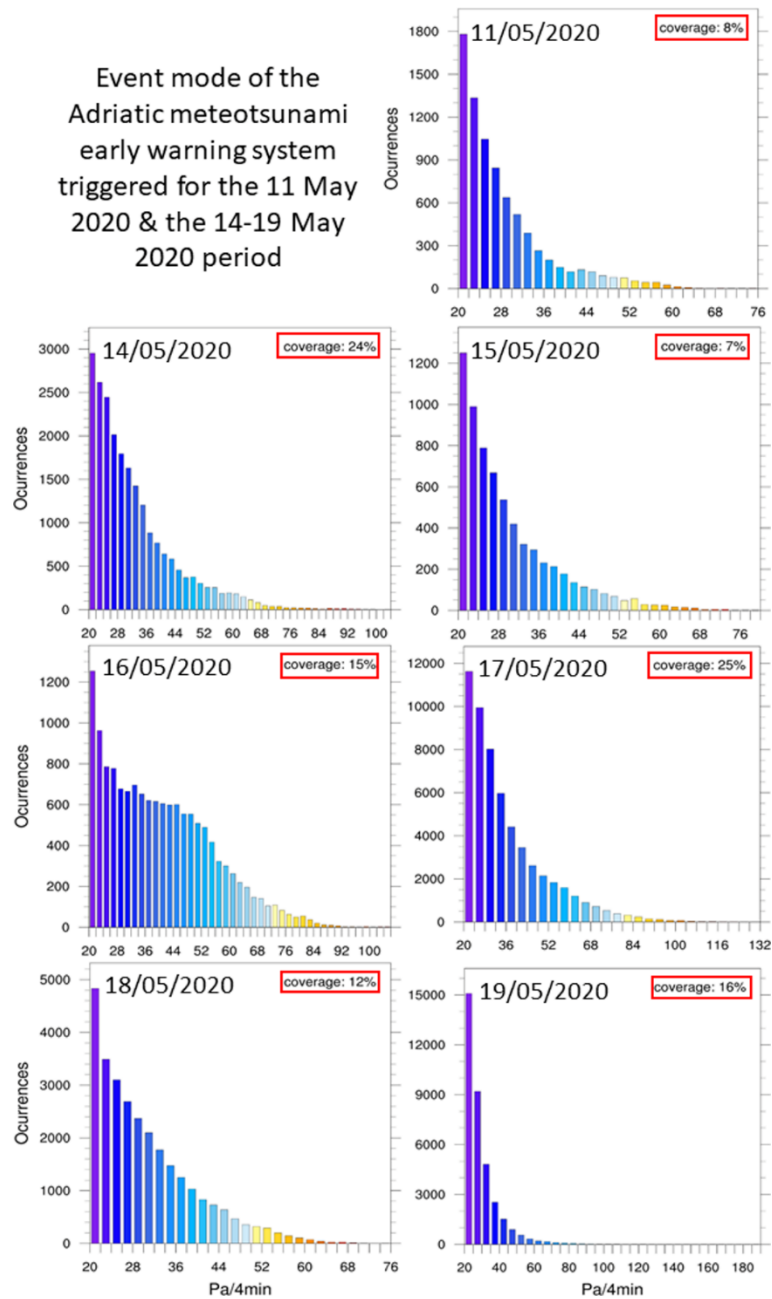

**Figure S1: Distribution of the derivative in time of the meteotsunamigenic disturbance amplitude used as a criteria to trigger the event mode of the Croatian Meteotsunami Early Warning System (CMeEWS).**

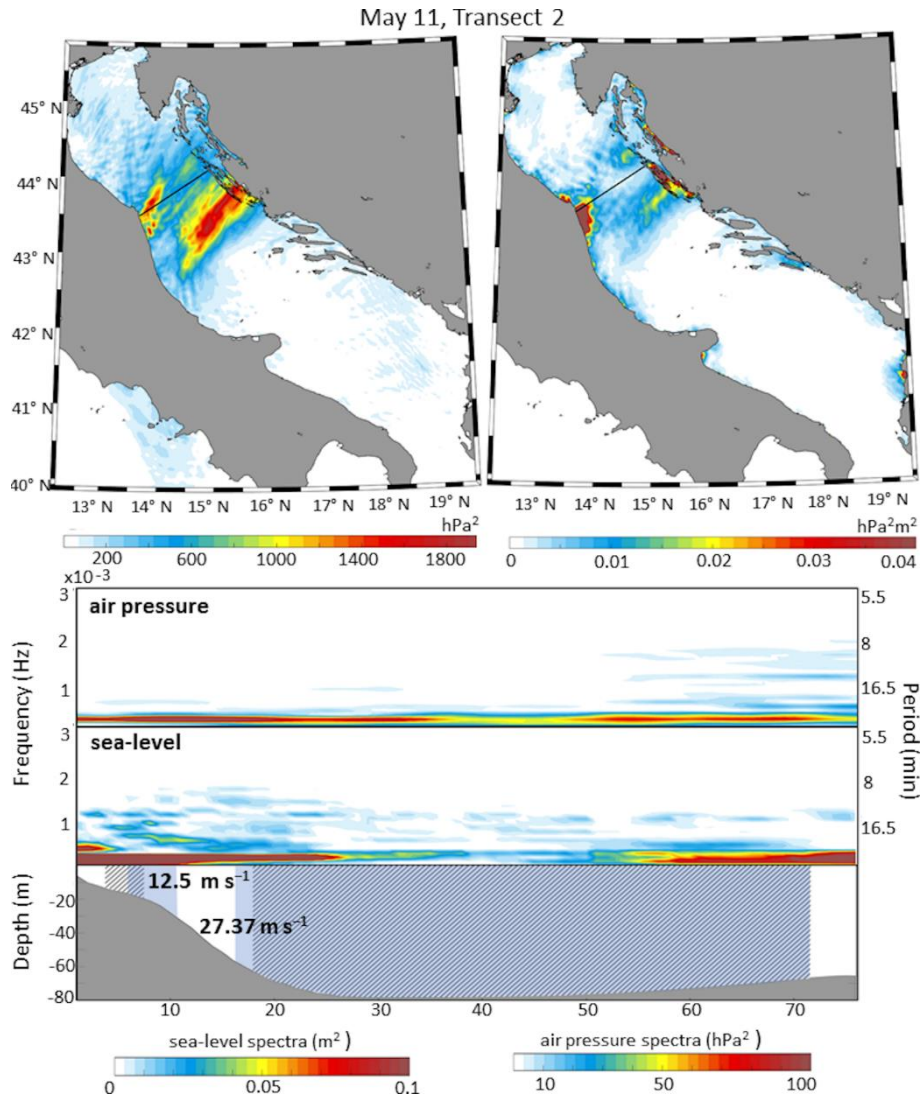

5 **Figure S2: Meteorological and oceanographic data of the 11<sup>th</sup> of May 2020 along Transect 2. Air pressure spatial variance (top left panel) and transect sampling criteria (top right panel) have a mark of the selected transect containing meteorological energy banner (solid black line). Spectrograms of high-pass filtered mean sea-level air pressure (air pressure) and sea-level along the selected transect (middle panels) are conjoined by sections of the associated depth profile (bottom panel) where the Proudman resonance is likely to occur (shaded with diagonal stripes) and where the speed of the disturbance is calculated (in blue).**

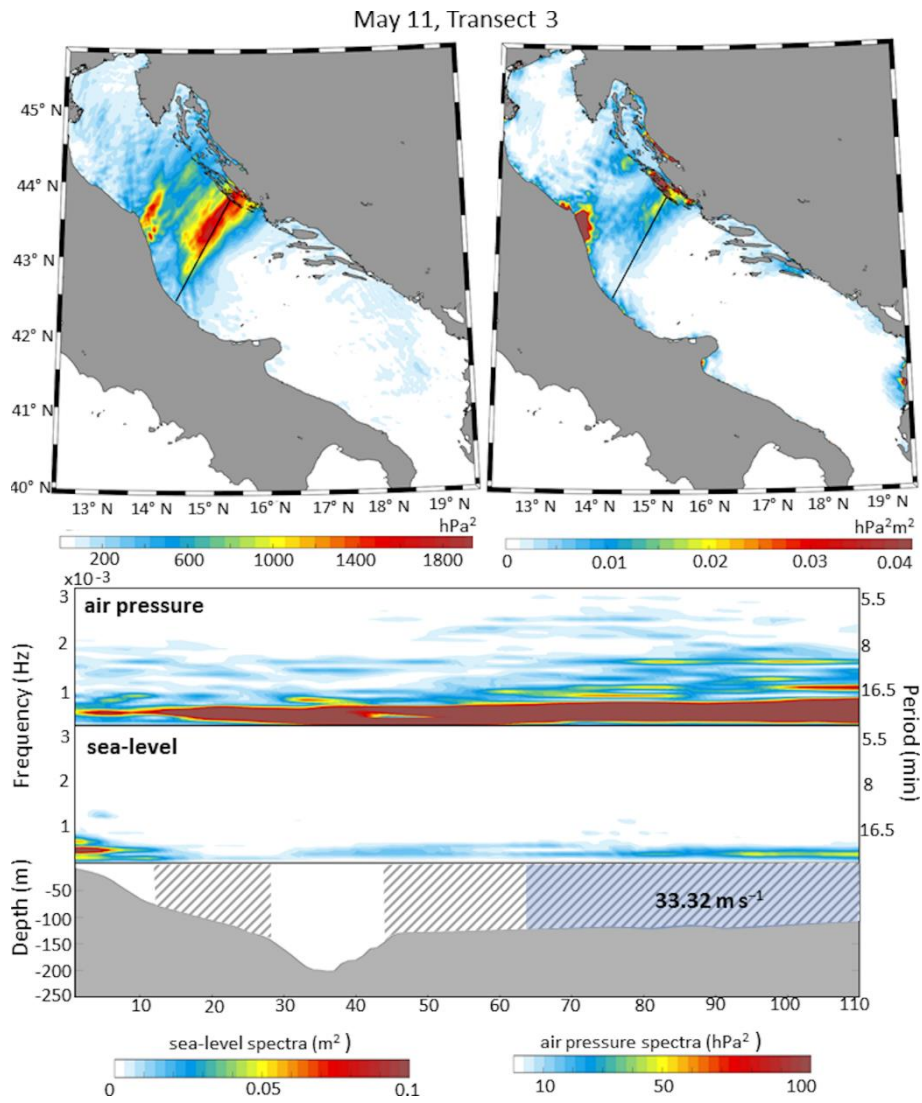

Figure S3: As in Figure S2, but for the meteotsunamigenic disturbance of the 11<sup>th</sup> of May 2020 along Transect 3.

May 14, Transect 2

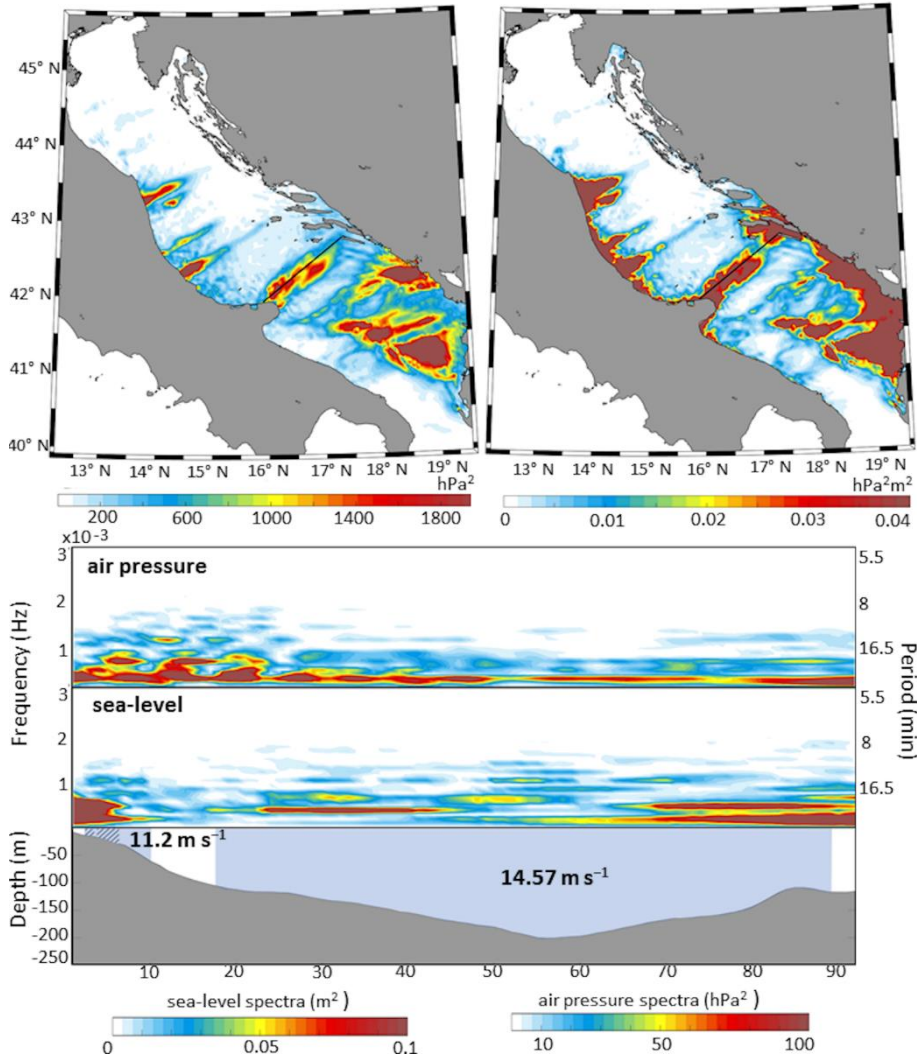

Figure S4: As in Figure S2, but for the meteotsunamigenic disturbance of the 14<sup>th</sup> of May 2020 along Transect 2.

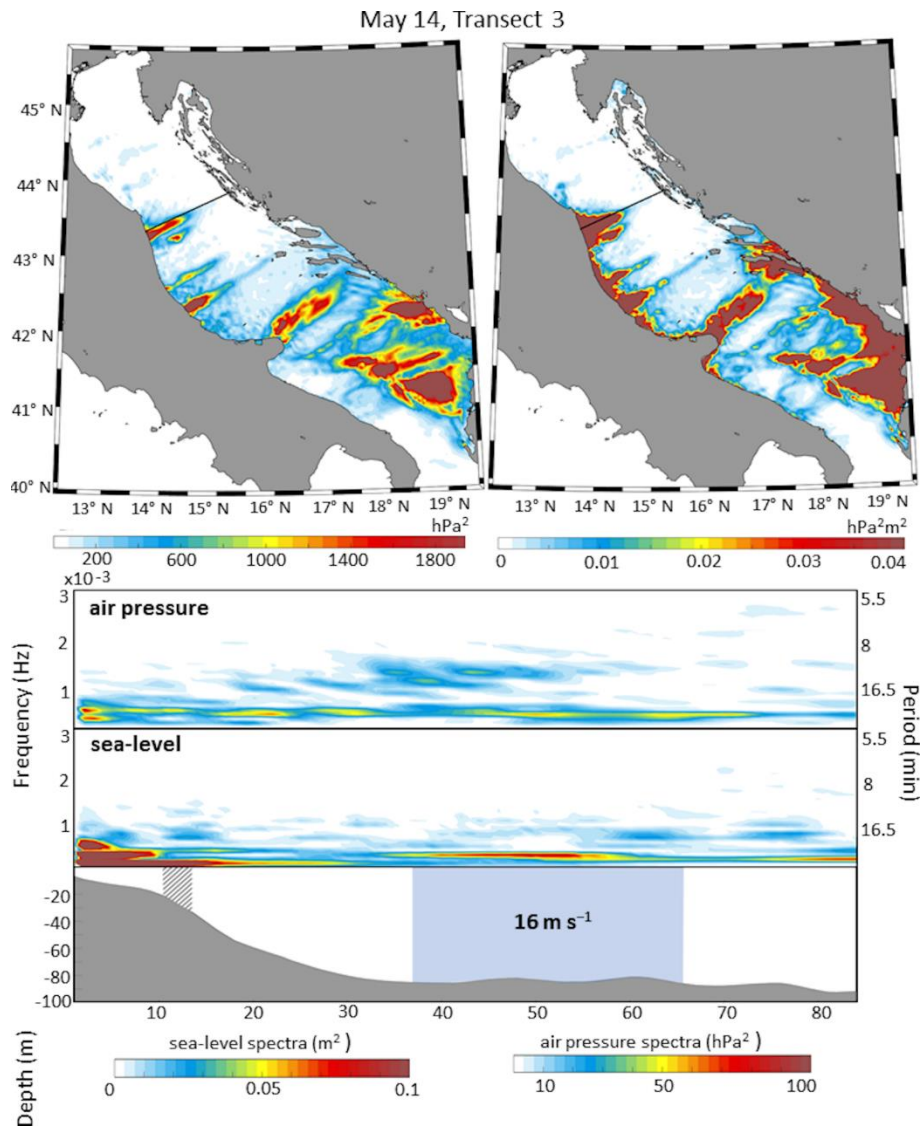

15 Figure S5: As in Figure S2, but for the meteosunamigenic disturbance of the 14<sup>th</sup> of May 2020 along Transect 3.

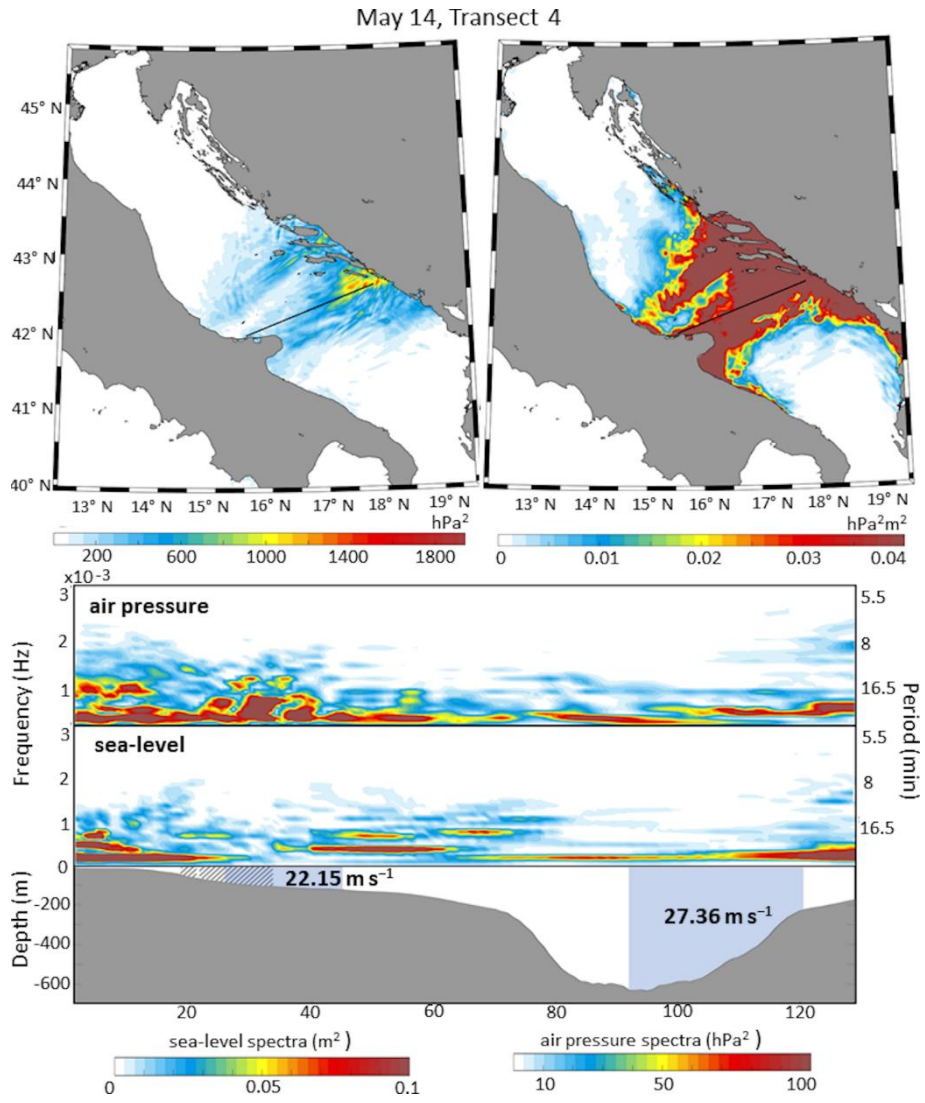

Figure S6: As in Figure S2, but for the meteotsunamigenic disturbance of the 14<sup>th</sup> of May 2020 along Transect 4.



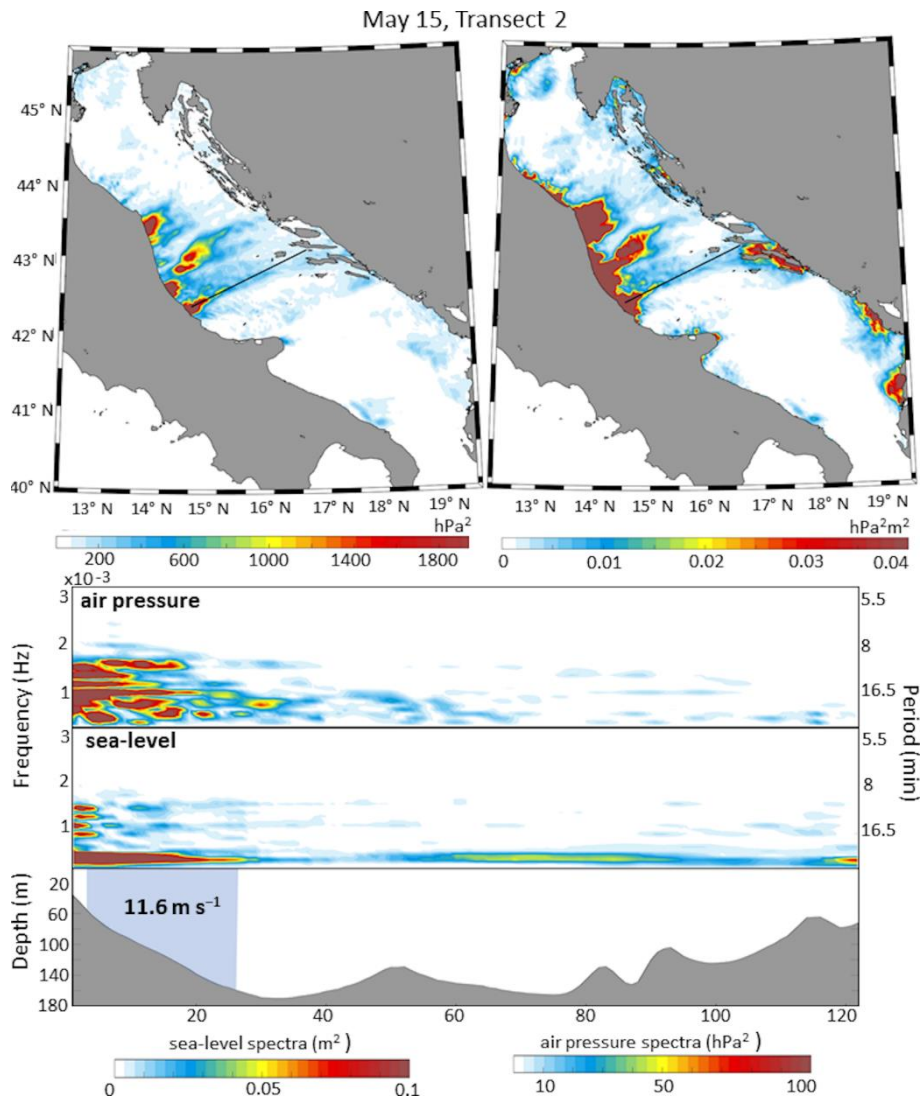

20 Figure S7: As in Figure S2, but for the meteotsunamigenic disturbance of the 15<sup>th</sup> of May 2020 along Transect 2.

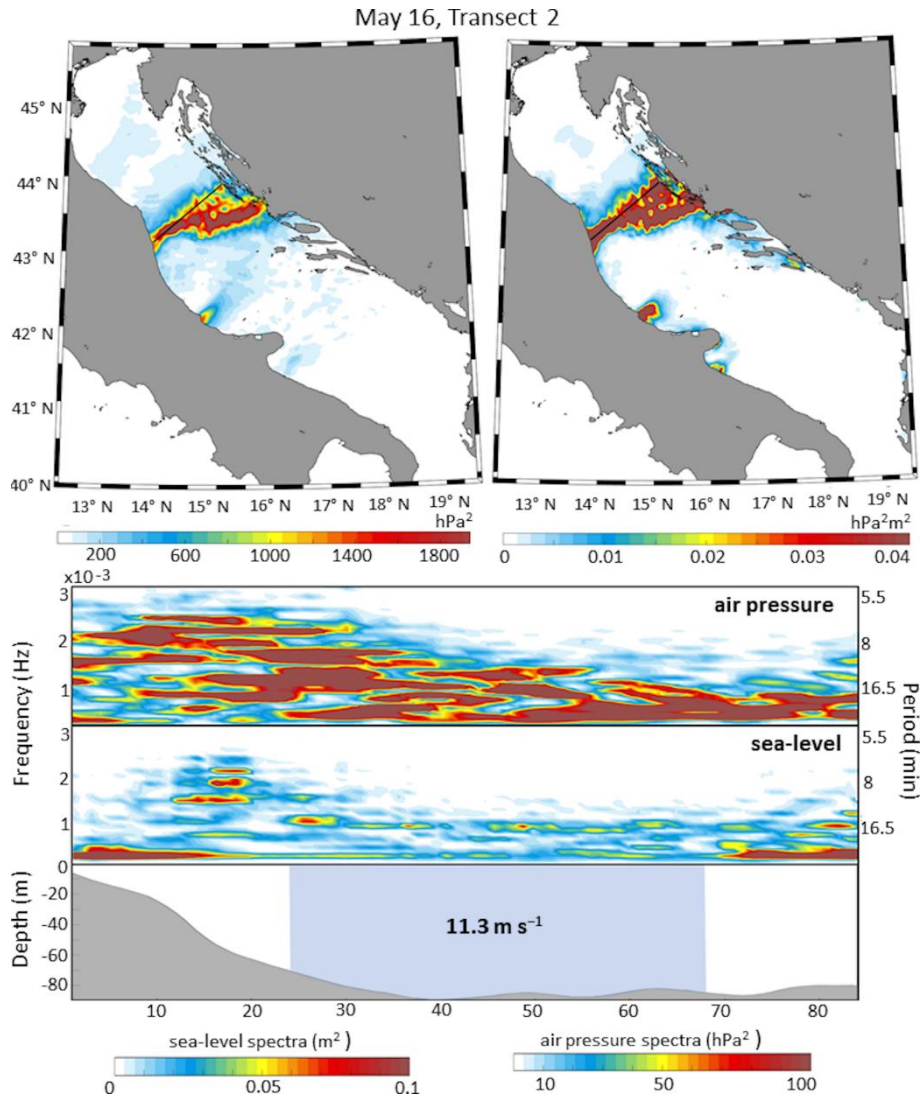

**Figure S8:** As in Figure S2, but for the meteotsunamigenic disturbance of the 16<sup>th</sup> of May 2020 along Transect 2.



May 16, Transect 3

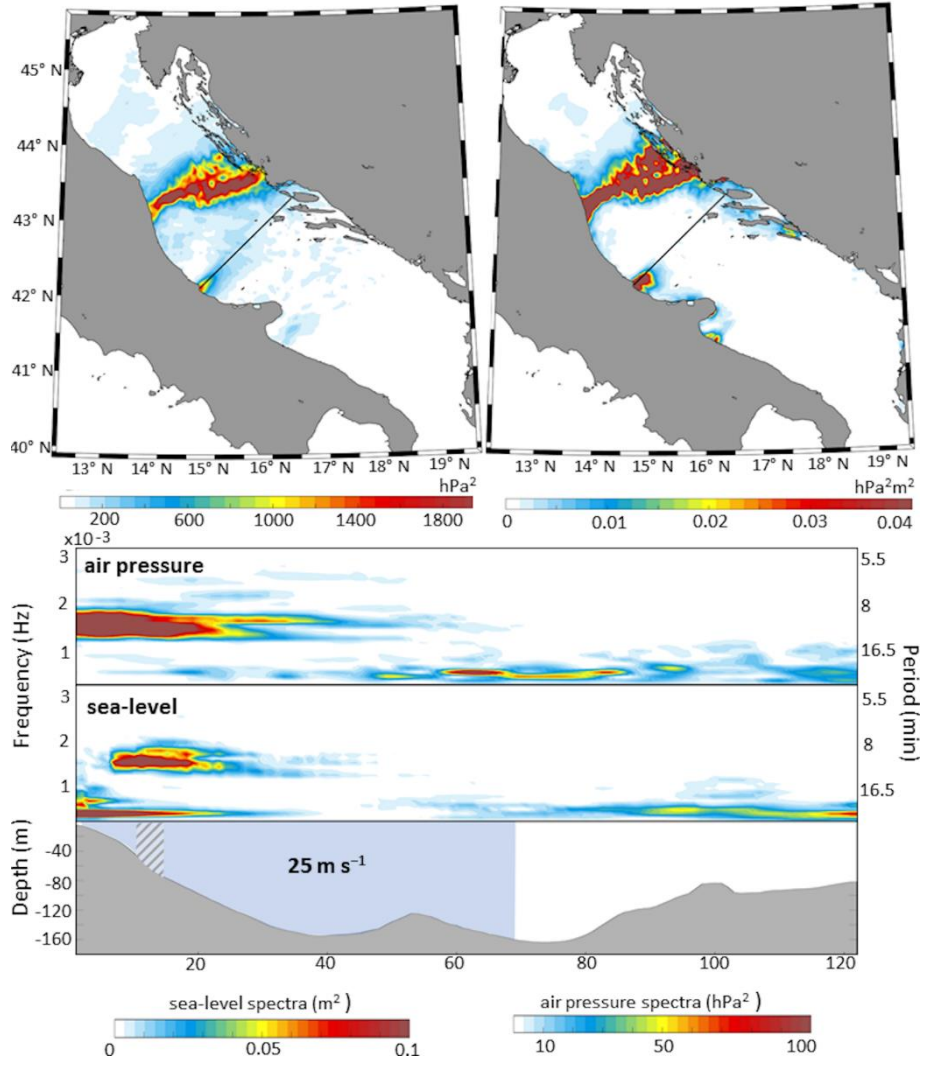

Figure S9: As in Figure S2, but for the meteotsunamigenic disturbance of the 16<sup>th</sup> of May 2020 along Transect 3.

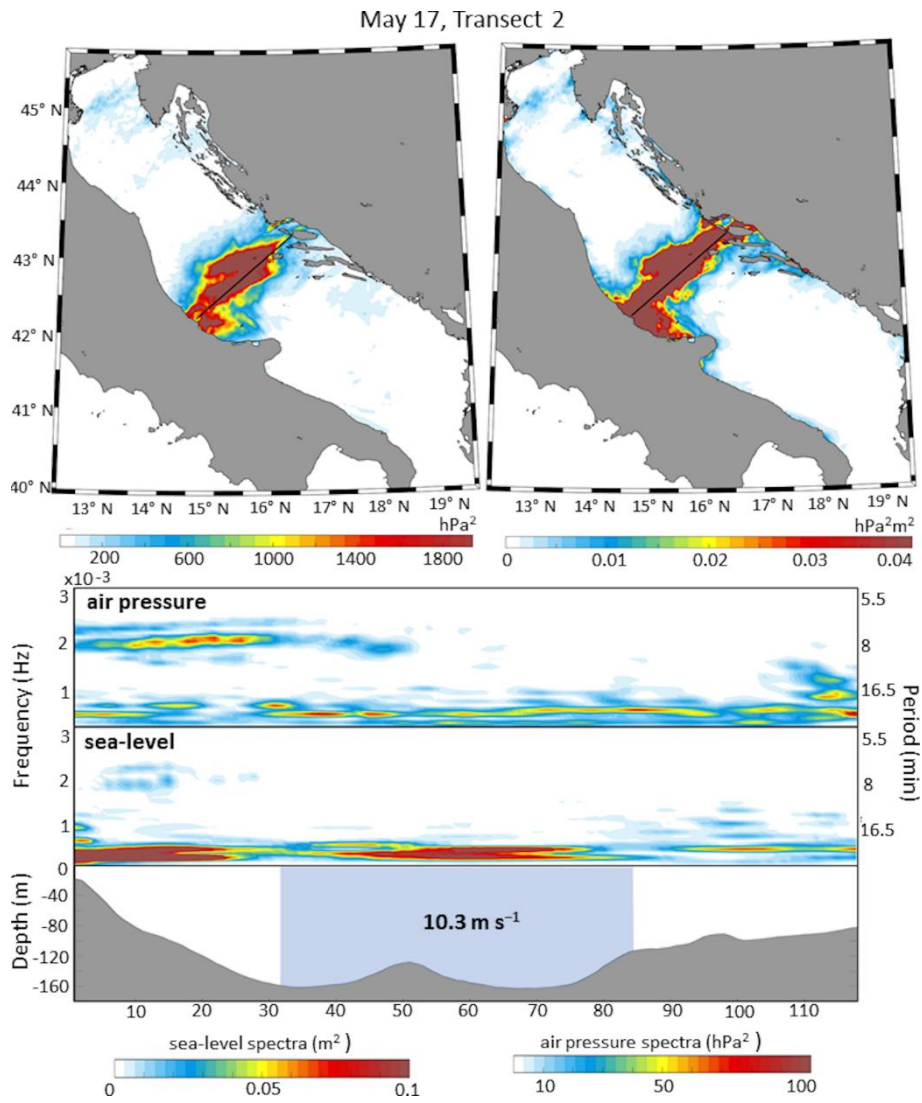

**Figure S10:** As in Figure S2, but for the meteotsunamigenic disturbance of the 17<sup>th</sup> of May 2020 along Transect 2.

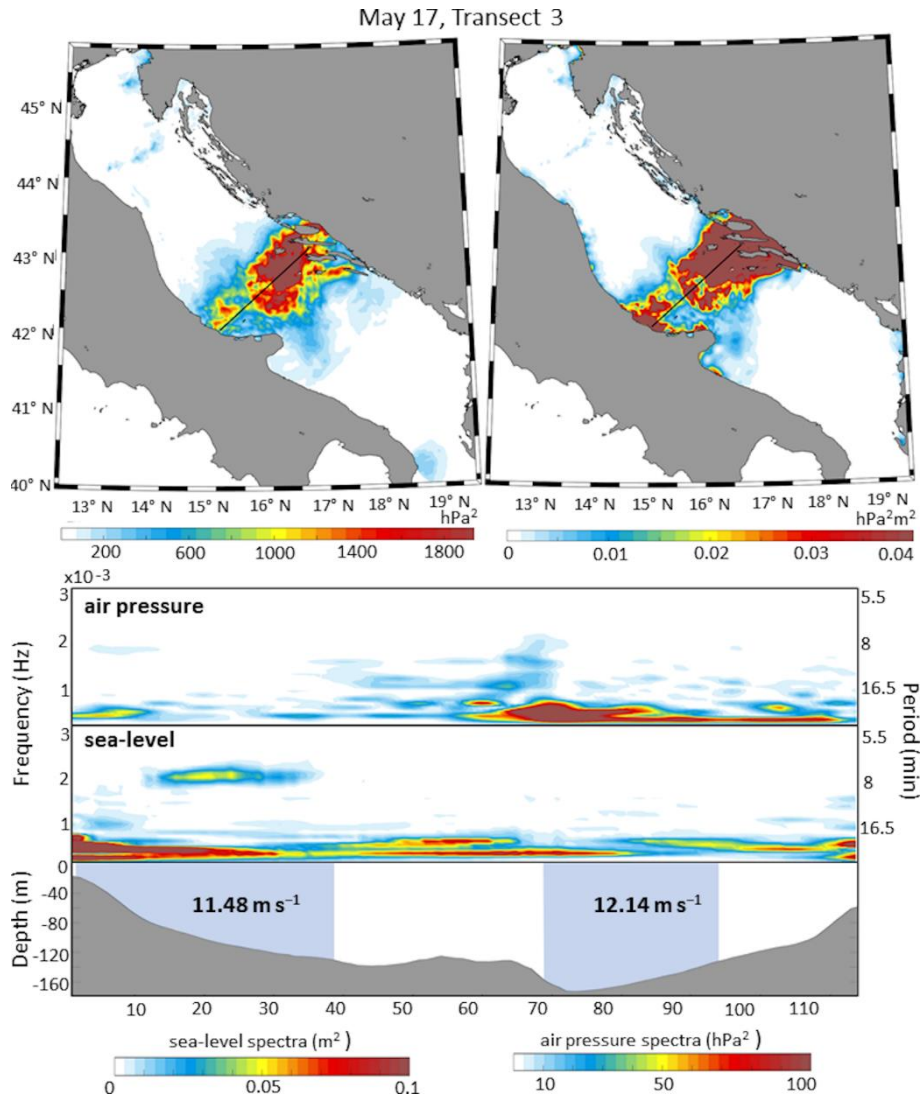

Figure 11: As in Figure S2, but for the meteosunamigenic disturbance of the 17<sup>th</sup> of May 2020 along Transect 3.

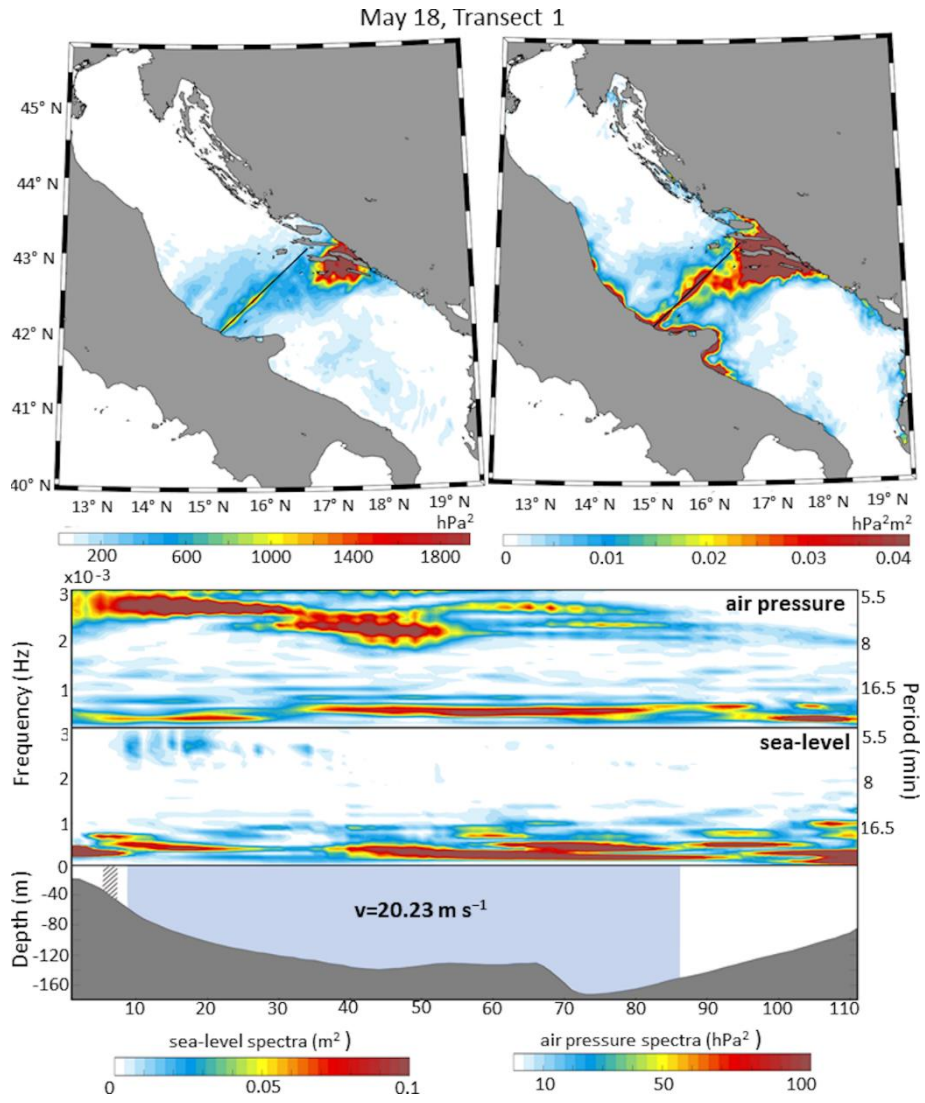

30 **Figure S12:** As in Figure S2, but for the meteotsunamigenic disturbance of the 18<sup>th</sup> of May 2020 along Transect 1.

May 18, Transect 2

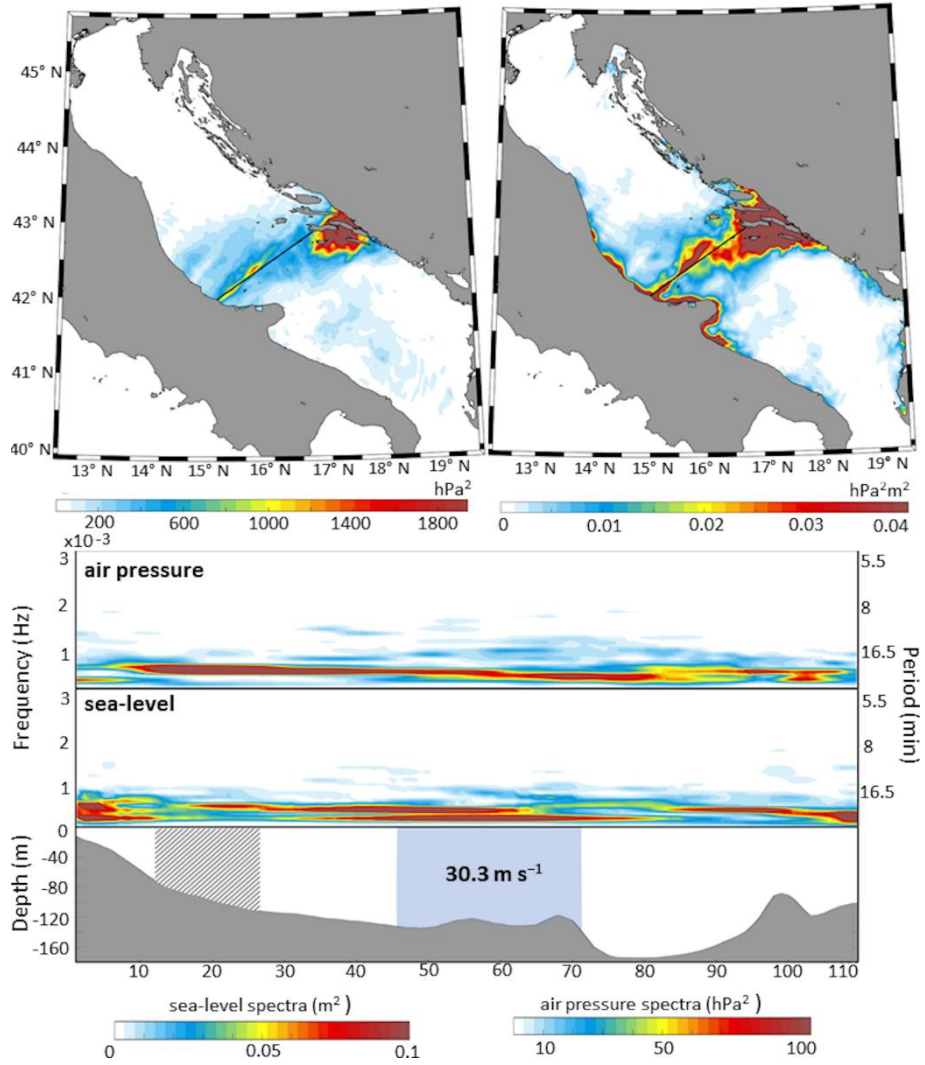

Figure S13: As in Figure S2, but for the meteotsunamigenic disturbance of the 18<sup>th</sup> of May 2020 along Transect 2.

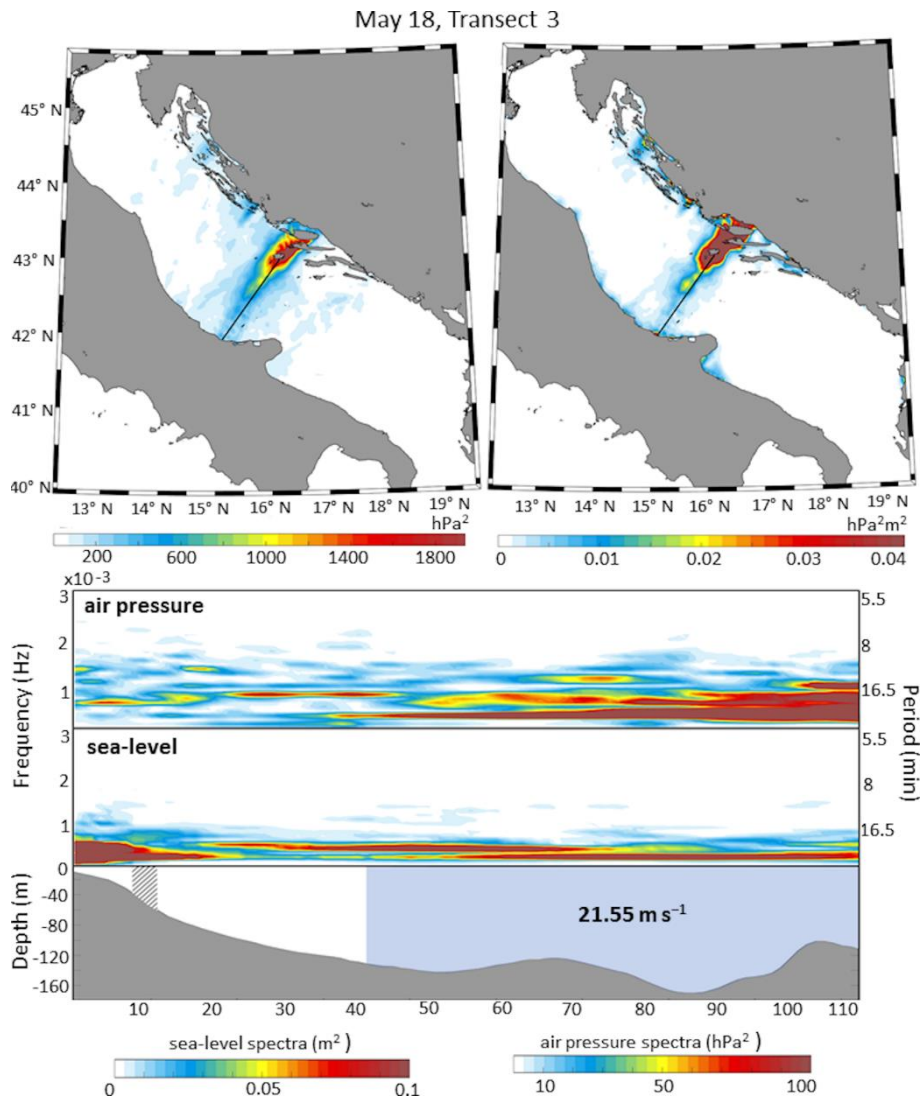

**Figure S14:** As in Figure S2, but for the meteotsunamigenic disturbance of the 18<sup>th</sup> of May 2020 along Transect 3.



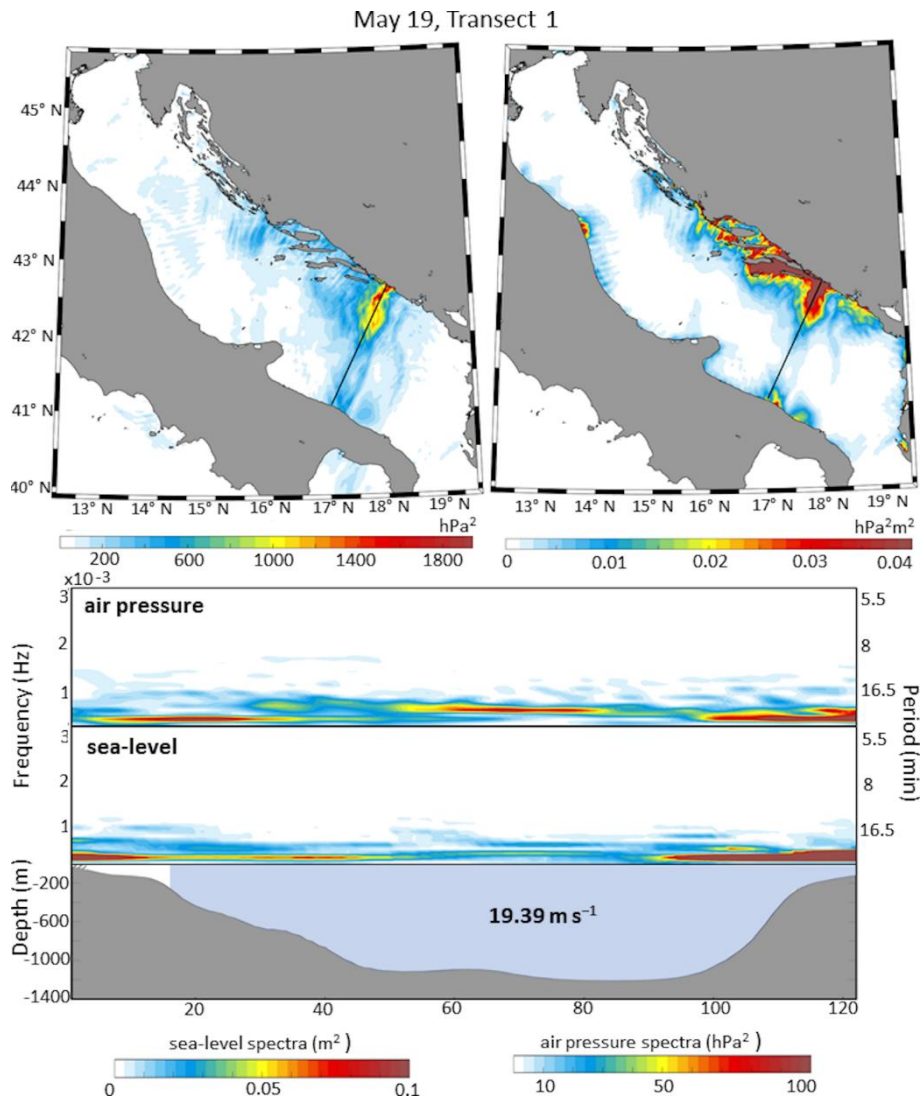

Figure S15: As in Figure S2, but for the meteotsunamigenic disturbance of the 19<sup>th</sup> of May 2020 along Transect 1.
